# Supplementary material for: Trends in the Epidemiology of Pneumocystis Pneumonia in Immunocompromised Patients without HIV Infection
Source: MDPI journal article supplement (doi:10.3390/jof9080812), 2023-07-31
Supplement: s1 [file s1]

**Table S1. Incidence and risk factors of PCP in patients with autoimmune and inflammatory diseases (AIIDs).**

| Types of AIIDs | Report years | First author [references] | Country  | No. of AIID cases | No. of PCP cases | Main risk factors for PCP                                                                                                                                                                           |
|----------------|--------------|---------------------------|----------|-------------------|------------------|-----------------------------------------------------------------------------------------------------------------------------------------------------------------------------------------------------|
| RA             | 2016         | Bruce [112]               | UK       | 17                | 17               | Use of TNF- $\alpha$ inhibitors (adalimumab, etanercept, infliximab and certolizumab)                                                                                                               |
|                | 2010         | Louie [113]               | USA      | 788               | 788              | Immunosuppressive therapies and biologic agents (infliximab and etanercept)                                                                                                                         |
|                | 1999         | Ward [114]                | USA      | 39                | 223              | Immunosuppressive medications                                                                                                                                                                       |
|                | 2007         | Kaur [70]                 | USA      | 49                | 84               | Infliximab therapy                                                                                                                                                                                  |
|                | 2015         | Mori [115]                | Japan    | 346               | 346              | Antirheumatic therapies (infliximab, etanercept, adalimumab, tocilizumab and abatacept)                                                                                                             |
|                | 2022         | Sonomoto [116]            | Japan    | 26                | 26               | Therapy with b/tsDMARDs                                                                                                                                                                             |
|                | 2017         | Mimori [117]              | Japan    | 12                | 12               | Use of glucocorticoids and concomitant respiratory diseases                                                                                                                                         |
|                | 2017         | Hashimoto [118]           | Japan    | 16                | 16               | Underlying lung diseases and use of corticosteroids, methotrexate and biologics (infliximab, golimumab, abatacept and adalimumab)                                                                   |
|                | 2018         | Yukawa [119]              | Japan    | 19                | 19               | High doses of prednisolone and methotrexate                                                                                                                                                         |
|                | 2008         | Tokuda [120]              | Japan    | 14                | 14               | Immunosuppressive therapies                                                                                                                                                                         |
|                | 2017         | Mecoli [121]              | USA      | 2                 | 21               | High doses of corticosteroids, TNF inhibitors and methotrexate                                                                                                                                      |
|                | 2021         | Hsu [122]                 | Taiwan   | 56                | 242              | Use of immunosuppressants (steroids dose and mycophenolate)                                                                                                                                         |
|                | 2014         | Fillatre [97]             | France   | 8                 | 154              | Impaired immunity due to underlying diseases, corticosteroid therapies                                                                                                                              |
|                | 2017         | Li [123]                  | China    | 3                 | 52               | Immunosuppressive therapies (steroids) and biologic agents (cyclophosphamide, mycophenolate mofetil, methotrexate, cyclosporin A, azathioprine, leflunomide, rituximab, infliximab and tacrolimus). |
|                | 1996         | Yale [4]                  | USA      | 3                 | 116              | Systemic corticosteroid therapy                                                                                                                                                                     |
| SLE            | 1994         | Godeau [124]              | France.  | 6                 | 34               | Treatment with cytotoxic agents and corticosteroids                                                                                                                                                 |
|                | 1999         | Ward [114]                | USA      | 94                | 223              | Immunosuppressive medications                                                                                                                                                                       |
|                | 2009         | Lertnawapan               | Thailand | 15                | 15               | High-dose prednisolone therapy                                                                                                                                                                      |

|             |      |                  |          |     |     |                                                                                                                                                                                                    |
|-------------|------|------------------|----------|-----|-----|----------------------------------------------------------------------------------------------------------------------------------------------------------------------------------------------------|
|             |      | [125]            |          |     |     |                                                                                                                                                                                                    |
|             | 2019 | Wang [126]       | China    | 9   | 9   | Long-term use of glucocorticoids and the immunosuppressants                                                                                                                                        |
|             | 2017 | Mecoli [121]     | USA      | 4   | 21  | High-dose corticosteroids and cyclophosphamide                                                                                                                                                     |
|             | 2008 | Gupta [127]      | NA       | 121 | 121 | Use of cyclophosphamide and high-dose corticosteroids, hypocomplementemia                                                                                                                          |
|             | 2020 | Yeo [128]        | Taiwan   | 58  | 58  | Use of mycophenolate mofetil/mycophenolic acid and high-dose cyclophosphamide or glucocorticoid                                                                                                    |
|             | 2017 | Li [123]         | China    | 16  | 52  | Use of steroids and other immunosuppressive agents including Cyclophosphamide, mycophenolate mofetil, methotrexate, cyclosporin A, azathioprine, leflunomide, rituximab/infliximab and tacrolimus) |
|             | 1996 | Yale [4]         | USA      | 1   | 116 | Systemic corticosteroid therapy                                                                                                                                                                    |
|             | 2021 | Hsu [122]        | Taiwan   | 74  | 242 | Underlying ARDs and use of immunosuppressants (steroids and mycophenolate)                                                                                                                         |
| PsA         | 2007 | Kaur [70]        | USA      | 1   | 84  | Infliximab therapy                                                                                                                                                                                 |
|             | 2007 | Lahiff [129]     | Ireland. | 1   | 1   | Treatment with etanercept                                                                                                                                                                          |
|             | 2016 | Jobanputra [130] | UK       | 1   | 1   | Use of G-CSF                                                                                                                                                                                       |
| AS          | 2007 | Kaur [70]        | USA      | 2   | 84  | Infliximab therapy                                                                                                                                                                                 |
| Scleroderma | 1999 | Ward [114]       | USA      | 12  | 223 | Immunosuppressive medications                                                                                                                                                                      |
| SS          | 2021 | Hsu [122]        | Taiwan   | 20  | 242 | Underlying ARDs and immunosuppressants (steroids and mycophenolate)                                                                                                                                |
| Sarcoid     | 2017 | Mecoli [121]     | USA      | 2   | 21  | High-dose corticosteroids and immunosuppressants (cyclophosphamide and methotrexate)                                                                                                               |
| GPA         | 1999 | Ward [114]       | USA      | 31  | 22  | Immunosuppressive medications                                                                                                                                                                      |
|             |      |                  |          |     | 3   |                                                                                                                                                                                                    |
|             | 2007 | Kaur [70]        | USA      | 2   | 84  | Infliximab therapy                                                                                                                                                                                 |
|             | 2017 | Mecoli [121]     | USA      | 3   | 21  | High-dose corticosteroids and cyclophosphamide                                                                                                                                                     |
|             | 1994 | Godeau [124]     | France.  | 12  | 34  | Use of corticosteroids and cytotoxic agents                                                                                                                                                        |
|             | 1991 | Sen [40]         | USA      | 1   | 4   | Treatment with cyclophosphamide and prednisone                                                                                                                                                     |
|             | 1996 | Yale [4]         | USA      | 2   | 116 | Systemic corticosteroid therapy                                                                                                                                                                    |
| GN          | 2007 | Wen [131]        | Taiwan   | 1   | 1   | Immunosuppressive therapies (corticosteroids and cyclophosphamide)                                                                                                                                 |

|                       |      |                      |        |    |     |                                                                                                             |
|-----------------------|------|----------------------|--------|----|-----|-------------------------------------------------------------------------------------------------------------|
|                       | 1996 | Yale [4]             | USA    | 2  | 116 | Systemic corticosteroid therapy                                                                             |
|                       | 2012 | Yang [132]           | Taiwan | 7  | 7   | High-dose corticosteroids and cyclophosphamide, cyclosporine A, mycophenolate mofetil and azathioprine)     |
|                       | 2014 | Fillatre [97]        | France | 5  | 154 | Impaired immunity due to underlying disease and corticosteroid therapy                                      |
| Still's disease       | 2007 | Kaur [70]            | USA    | 1  | 84  | Infliximab therapy                                                                                          |
| Inflammatory myopathy | 1999 | Ward [114]           | USA    | 26 | 223 | Immunosuppressive medications                                                                               |
| Systemic sclerosis    | 2017 | Mecoli [121]         | USA    | 1  | 21  | High-dose corticosteroids, cyclophosphamide, and methotrexate                                               |
|                       | 2021 | Hsu [122]            | Taiwan | 7  | 242 | Underlying ARDs and concomitant immunosuppressants (steroid, and mycophenolate)                             |
|                       | 2014 | Fillatre [97]        | France | 2  | 154 | Immunosuppression due to underlying disease, and corticosteroid therapy                                     |
| HSP                   | 2015 | Hernández Roca [133] | Spain  | 1  | 1   | Immunosuppression due to underlying disease and immunosuppressive therapy (cyclophosphamide and prednisone) |
| PAN                   | 1999 | Ward [114]           | USA    | 21 | 223 | Immunosuppressive medications                                                                               |
|                       | 2017 | Mecoli [121]         | USA    | 1  | 21  | High-dose corticosteroids and cyclophosphamide                                                              |
|                       | 1977 | Bungo [134]          | USA    | 1  | 1   | Immunosuppressive therapies (high doses of corticosteroids, cyclophosphamide and methotrexate)              |
|                       | 2014 | Fillatre [97]        | France | 3  | 154 | Immunosuppression due to the underlying disease and use of corticosteroids.                                 |
|                       | 1994 | Godeau [124]         | France | 4  | 34  | Treatment with cytotoxic agents and corticosteroids                                                         |
|                       | 1996 | Yale [4]             | USA    | 1  | 116 | Systemic corticosteroid therapy                                                                             |
|                       | 1991 | Sen [40]             | USA    | 1  | 4   | Treated with cyclophosphamide and prednisone                                                                |
| Myositis              | 2007 | Kaur [70]            | USA    | 2  | 84  | Infliximab therapy                                                                                          |
|                       | 2021 | Sabbagh [135]        | USA.   | 13 | 13  | Immunosuppressive therapy, and existing interstitial lung disease.                                          |
|                       | 2017 | Mecoli [121]         | USA    | 4  | 21  | High-dose corticosteroids and cyclophosphamide                                                              |
|                       | 1994 | Godeau [124]         | France | 5  | 34  | Treatment with cytotoxic agents and corticosteroids                                                         |
|                       | 2021 | Hsu [122]            | Taiwan | 21 | 242 | Underlying ARDs, and immunosuppressants (steroid dose and mycophenolate)                                    |
|                       | 2014 | Fillatre [97]        | France | 2  | 154 | Immunosuppression due to the underlying disease, and use of corticosteroids                                 |
|                       | 2017 | Li [123]             | China  | 6  | 52  | Use of steroids and other immunosuppressive agents cyclophosphamide,                                        |

|                     |      |                |                         |        |     |                                                                                                                         |
|---------------------|------|----------------|-------------------------|--------|-----|-------------------------------------------------------------------------------------------------------------------------|
|                     |      |                |                         |        |     | mycophenolate mofetil, methotrexate, cyclosporin A, azathioprine, leflunomide, rituximab/infliximab, and tacrolimus)    |
|                     | 1996 | Yale [4]       | USA                     | 2      | 116 | Systemic corticosteroid therapy                                                                                         |
| IBD                 | 2014 | Fillatre [97]  | France                  | 1      | 154 | Immunosuppression due to the underlying disease, and use of corticosteroids                                             |
|                     | 2007 | Kaur [70]      | USA                     | 16     | 84  | Infliximab therapy                                                                                                      |
|                     | 2017 | Cotter [136]   | USA                     | 4      | 4   | Use of corticosteroids, immune-suppressive medications, and biologics                                                   |
|                     | 2017 | Lawrence [137] | NA                      | 92     | 92  | Immunosuppressive therapies (corticosteroids, infliximab, thiopurines, anti-TNF agents and calcineurin inhibitors)      |
|                     | 2022 | Schwartz [138] | USA                     | 180    | 180 | Underlying congenital immunodeficiency, and use of corticosteroids                                                      |
|                     | 2019 | Yoshida [139]  | Japan                   | 28     | 28  | Treatment with steroid, thiopurine, calcineurin inhibitor, and anti-TNF agents                                          |
|                     | 2013 | Long [140]     | USA                     | 38     | 38  | Corticosteroid therapy                                                                                                  |
|                     | 2022 | Nam [141]      | Korea                   | 6 (UC) | 6   | Corticosteroid therapy and other immunosuppressive therapies (infliximab, azathioprine, and adalimumab)                 |
|                     | 2010 | Lawrance [142] | Australia & New Zealand | 2 (CD) | N/A | Immunosuppressive therapies (mycophenolate mofetil, methotrexate and prednisolone) and use of infliximab and adalimumab |
| Polyneuritis        | 2014 | Fillatre [97]  | France                  | 2      | 154 | Immunosuppression due to underlying diseases, and use of corticosteroids                                                |
| Systemic vasculitis | 1996 | Yale [4]       | USA                     | 1      | 116 | Systemic corticosteroid therapy                                                                                         |
| Chronic hepatitis   | 1996 | Yale [4]       | USA                     | 1      | 116 | Systemic corticosteroid therapy                                                                                         |

**Abbreviations:** TNF, tumor necrosis factor ; b/tsDMARDs, biologic and targeted synthetic disease-modifying antirheumatic drugs; ARDs, autoimmune rheumatic diseases; SLE, systemic lupus erythematosus; RA, rheumatoid arthritis; AS, ankylosing spondylitis; PsA, psoriatic arthritis; SS, Sjogren syndrome; GPA, granulomatosis with polyangiitis (also known as Wegener's granulomatosis); GN, glomerulonephritis; myositis including polymyositis (PM) and dermatomyositis (DM); HSP, Henoch-Schönlein purpura; UC, ulcerative colitis;; PAN, polyarteritis nodosa; PSL, prednisolone; IBD: inflammatory bowel disease, including Crohn's disease (CD) and ulcerative colitis (UC); NA, not available.
