# Supplementary material for: Trends in the Epidemiology of Pneumocystis Pneumonia in Immunocompromised Patients without HIV Infection
Source: MDPI journal article supplement (doi:10.3390/jof9080812), 2023-07-31
Supplement: s1 [file s1]

**Table S3. Reports of co-infection with *P. jirovecii* and SARS-CoV-2 in patients with or without HIV/AIDS.**

| Countries    | Total No.<br>of cases | No. of cases     |               | References        |
|--------------|-----------------------|------------------|---------------|-------------------|
|              |                       | Without HIV/AIDS | With HIV/AIDS |                   |
| France       | 34                    | 34               | 0             | [228-232]         |
| Italy        | 23                    | 22               | 1             | [224,225,233-237] |
| Pakistan     | 10                    | 10               | 0             | [238]             |
| Greece       | 8                     | 8                | 0             | [239]             |
| India        | 6                     | 6                | 0             | [15,240]          |
| US           | 6                     | 3                | 3             | [241-246]         |
| China        | 4                     | 2                | 2             | [247-249]         |
| Spain        | 4                     | 2                | 2             | [250-253]         |
| UK           | 4                     | 1                | 3             | [254-257]         |
| Canada       | 3                     | 3                | 0             | [226]             |
| Jordan       | 3                     | 3                | 0             | [258]             |
| Japan        | 3                     | 2                | 1             | [259,260]         |
| Iran         | 2                     | 2                | 0             | [261,262]         |
| South Africa | 2                     | 0                | 2             | [263,264]         |
| Romania      | 1                     | 1                | 0             | [265]             |
| Poland       | 1                     | 1                | 0             | [266]             |
| Morocco      | 1                     | 1                | 0             | [267]             |
| Germany      | 1                     | 0                | 1             | [268]             |
| Argentina    | 1                     | 0                | 1             | [269]             |
| Ireland      | 1                     | 0                | 1             | [270]             |
| Indonesia    | 1                     | 0                | 1             | [271]             |
