# Supplementary material for: Trends in the Epidemiology of Pneumocystis Pneumonia in Immunocompromised Patients without HIV Infection
Source: MDPI journal article supplement (doi:10.3390/jof9080812), 2023-07-31
Supplement: s1 [file s1]

**Table S4. Reports of PCP outbreaks in transplant patients.**

| First author<br>[reference]          | Year of<br>report | Country     | No. of<br>patients | Duration of<br>outbreaks<br>(months) | Transplanted<br>organs | Genotyping methods                                  | No. of <i>P.<br/>jirovecii</i><br>strains/clusters |
|--------------------------------------|-------------------|-------------|--------------------|--------------------------------------|------------------------|-----------------------------------------------------|----------------------------------------------------|
| Hardy [310]                          | 1984              | USA         | 14                 | 19                                   | Kidney                 | NA                                                  | NA                                                 |
| Hennequin [311]                      | 1995              | France      | 7                  | 6                                    | Kidney                 | NA                                                  | NA                                                 |
| Olsson [312]                         | 2001              | Sweden      | 10                 | 8                                    | Kidney                 | mtLSU                                               | 3                                                  |
| Hocker [313]                         | 2005              | Germany     | 7                  | 5                                    | Kidney                 | MLST (ITS1, 26S rRNA, mtLSU<br>and <i>β-tub</i> )   | 5                                                  |
| de Boer [314]                        | 2007              | Netherlands | 8                  | 11                                   | Kidney                 | ITS1 and ITS2                                       | >5                                                 |
| Schmoldt [315]                       | 2008              | Germany     | 16                 | 8                                    | Kidney                 | MLST (ITS1, <i>β-tub</i> , 26S rRNA<br>and mtLSU)   | 1                                                  |
| Yazaki [316]                         | 2009              | Japan       | 27                 | 22                                   | Kidney                 | ITS1 and ITS2                                       | 1                                                  |
| Arichi [317]                         | 2009              | Japan       | 9                  | 7                                    | Kidney                 | mtLSU                                               | 5                                                  |
| Gianella [318]                       | 2010              | Switzerland | 20                 | 20                                   | Kidney                 | MLST (ITS1, 26S rRNA, mtLSU<br>and <i>β-tub</i> )   | 1                                                  |
| Wynckel [319]                        | 2011              | France      | 17                 | 12                                   | Kidney                 | ITS1 and ITS2                                       | 2                                                  |
| Phipps [320]                         | 2011              | Australia   | 14                 | 9                                    | Kidney                 | MLST (ITS, mtLSU, <i>β-tub</i> and<br><i>dhps</i> ) | NA                                                 |
| Thomas [321]                         | 2011              | UK          | 21*                | 21                                   | Kidney                 | MLST (ITS, mtLSUr)                                  | >5                                                 |
|                                      |                   |             | 11*                | 12                                   | Kidney                 | MLST (ITS, mtLSU)                                   | >5                                                 |
| Pliquett [322]                       | 2012              | Germany     | 17                 | 60                                   | Kidney                 | MLST (ITS1, <i>β-tub</i> , 26S rRNA<br>and mtLSU)   | 3                                                  |
| Brunot [323]                         | 2012              | France      | 7                  | 9                                    | Kidney                 | NA                                                  | 1                                                  |
| Chapman [324] and<br>Nankivell [325] | 2013              | Australia   | 83                 | 24                                   | Kidney                 | MLST (ITS, mtLSU, <i>β-tub</i> and<br><i>dhps</i> ) | NA                                                 |
| Rostvet [326]                        | 2013              | Denmark     | 29                 | 48                                   | Kidney and             | Msg-RFLP and MLST (ITS1,                            | 3                                                  |

|                                             |      |         |    |    |                               |                                                                               |    |
|---------------------------------------------|------|---------|----|----|-------------------------------|-------------------------------------------------------------------------------|----|
| Debourgogne [327]                           | 2014 | France  | 13 | 52 | liver<br>Kidney               | ITS2, 26S rRNA and mtLSU)<br>MLST(ITS1, mtLSU, 26S rRNA<br>and <i>β-tub</i> ) | 2  |
| Chandola [328]                              | 2014 | India   | 7  | 4  | Kidney                        | NA                                                                            | NA |
| Gits-Muselli [329]                          | 2015 | France  | 6  | 26 | Kidney                        | VNTR                                                                          | 1  |
| Desoubeaux [330]                            | 2016 | France  | 4  | 5  | Liver                         | MLST ( <i>sod</i> , mtLSU and <i>cob</i> )                                    | 1  |
| Mulpuru [331]                               | 2016 | Canada  | 10 | 12 | Kidney                        | ITS1 and ITS2                                                                 | 1  |
| Urabe [332]                                 | 2016 | Japan   | 8  | NA | Kidney                        | MLST ( <i>β-tub</i> , mtLSU, <i>sod</i> and<br><i>cob</i> )                   | 1  |
| Inkster [333]                               | 2017 | UK      | 24 | 15 | Kidney                        | MLST (ITS1 and mtLSU)                                                         | 2  |
| Vindrios [107]                              | 2017 | France  | 7  | 5  | Heart                         | MLST (mtLSU, <i>sod</i> and <i>cob</i> )                                      | 1  |
| Robin [334]                                 | 2017 | France  | 12 | 7  | Stem cell                     | VNTR                                                                          | 5  |
| Frealle [335]                               | 2017 | France  | 5  | 33 | Kidney                        | mtLSU                                                                         | 2  |
| Alanio [336]                                | 2017 | France  | 13 | NA | Kidney                        | VNTR                                                                          | 1  |
|                                             |      | Belgium | 5  | NA | Kidney                        | VNTR                                                                          | 1  |
|                                             |      | UK      | 2  | NA | Kidney                        | VNTR                                                                          | 1  |
| Wintenberger [337]<br>and Charpentier [338] | 2017 | France  | 12 | 10 | Lung, kidney,<br>heart, liver | NGS-MLST ( <i>cob</i> , mtLSU and<br><i>sod</i> )                             | 9  |
| Nevez [339]                                 | 2018 | France  | 22 | 14 | Kidney                        | MLST ( <i>dhps</i> , ITS1, ITS2 and<br>mtLSU)                                 | 1  |
| Miguel Montanes<br>[77]                     | 2018 | France  | 15 | 32 | Liver                         | NA                                                                            | NA |
| Ricci [340]                                 | 2018 | Brazil  | 17 | 8  | Kidney                        | MLST (ITS1, ITS2, mtLSU, 26S<br>rRNA and <i>dhps</i> )                        | 5  |
| Veronese [341]                              | 2018 | Italy   | 6  | 10 | Heart                         | MLST ( <i>β-tub</i> , <i>dhps</i> , mtLSU, ITS1<br>and ITS2)                  | 2  |
| Szydlowicz [342]                            | 2019 | Poland  | 8  | 33 | Kidney                        | MLST ( <i>mtLSU</i> , <i>cob</i> , <i>dhps</i> and <i>sod</i> )               | >5 |

|                               |        |     |    |                      |                                                        |                         |   |
|-------------------------------|--------|-----|----|----------------------|--------------------------------------------------------|-------------------------|---|
| Hosseini-Moghaddam 2020 [343] | France | 10  | 23 | Heart, kidney, liver | MLST (mtLSU, <i>cob</i> , <i>sod</i> and <i>dhps</i> ) | 1                       |   |
| Azar [58]                     | 2022   | USA | 19 | 11                   | Kidney                                                 | NGS-MLST** and msg-RFLP | 5 |

This table includes all reports of PCP outbreaks in transplant recipients shown in the heatmap in Figure 4. Reports without genotyping results are excluded in Table 3 in the main text to allow better visualization.

**Abbreviations:** NA, not available; ITS1, internal transcribed spacer 1; ITS2, internal transcribed spacer 2; mtLSU, mitochondrial large subunit rRNA; mtSSU, mitochondrial small subunit ribosomal RNA; Msg-RFLP, major surface glycoprotein (msg) gene-restriction fragment length polymorphism; UCS-VNTR, msg upstream conserved sequence-variable number of tandem repeats. MLST, multilocus sequence typing;  $\beta$ -tub, beta-tubulin; *sod*, superoxide dismutase; *cob*, cytochrome b; *dhps*, dihydropteroate synthase; 26S rRNA, nuclear 26S rRNA gene; NGS, next-generation sequencing.

\* Involved in two separate outbreaks in different hospitals.

\*\*Including mtLSU, PNC (mitochondrial polymorphic non-coding region), ITS1-5.8S-ITS2, 26S rRNA, *sod*, *dhps*, full mitogenome and nuclear rRNA operon.
