# Supplementary material for: Trends in the Epidemiology of Pneumocystis Pneumonia in Immunocompromised Patients without HIV Infection
Source: J Fungi (Basel). 2023 Jul 31;9(8):812. doi: 10.3390/jof9080812 (PMC10455156; doi:10.3390/jof9080812)
Supplement: Supplementary file 1 [file jof-09-00812-s001.zip]

Archive with 4 entries (4 files):
- jof-2397561-suppl-updated/Table S1_PCP in autoimmune and inflammatory diseases.pdf
- jof-2397561-suppl-updated/Table S2_PCP in primary immunodeficiencies.xlsx
- jof-2397561-suppl-updated/Table S3_PCP in COVID-19.pdf
- jof-2397561-suppl-updated/Table S4_PCP outbreaks in transplant patients.pdf
