# Supplementary material for: Trends in the Epidemiology of Pneumocystis Pneumonia in Immunocompromised Patients without HIV Infection
Source: J Fungi (Basel). 2023 Jul 31;9(8):812. doi: 10.3390/jof9080812 (PMC10455156; doi:10.3390/jof9080812)
Supplement: Supplementary file 1 [file jof-09-00812-s001.zip › jof-2397561-suppl-updated/Table S2_PCP in primary immunodeficiencies.xlsx]

## Sheet: Sheet1
Table S2. Occurrence of PCP in primary immunodeficiencies or inborn errors of immunity classified by the International Union of Immunological Societies Expert Committee (Tangye et al. J Clin Immunol 2022;42:1473)
Disease	Genetic defect	Inheritance	T cell count	B cell count	Immunoglobulin levels	Neutrophil count	Other affected cells	Reference for PCP	Major immunodeficiency category	Sub-category of mmunodeficiency
γc deficiency (common gamma chain SCID, CD132 deficiency)	IL2RG	XL	Very low	Normal to high	Low	Normal	Low NK	[165]	Immunodeficiencies affecting cellular and humoral immunity	T-B+ SCID
JAK3 deficiency	JAK3	AR	Very low	Normal to high	Low	Normal	Low NK	[166,167]	Immunodeficiencies affecting cellular and humoral immunity	T-B+ SCID
Adenosine deaminase (ADA) deficiency	ADA	AR	Very low	Low, decreasing	Low	Normal	Low NK	[168]	Immunodeficiencies affecting cellular and humoral immunity	T-B+ SCID
CARD11 deficiency (LOF)	CARD11	AR	Normal number, predominant naïve T-cells, poor proliferation	Normal, transitional B cell predominance				[169,170]	Immunodeficiencies affecting cellular and humoral immunity	CID generally less profound than SCID
CD40 deficiency	CD40 (TNFRSF5)	AR	Normal	sIgM+, IgD+ cells present, absent sIgG+, IgA+ and IgE+ cells	IgM nl or high low IgG, IgA	Variable		[171]	Immunodeficiencies affecting cellular and humoral immunity	CID generally less profound than SCID
CD40 ligand deficiency (CD154)	CD40LG (TNFSF5)	XL	Normal to low	sIgM+, IgD+ cells present, absent sIgG+, IgA+ and IgE+ cells	IgM nl or high low IgG, IgA	Variable		[172]	Immunodeficiencies affecting cellular and humoral immunity	CID generally less profound than SCID
DOCK8 deficiency	DOCK8	AR	Low, poor proliferation, few, poorly functioning Treg	Low, low CD27+ memory B cells Poor peripheral B cell tolerance.	Low IgM, normal to high IgG and IgA, high IgE		Low NK	[173]	Immunodeficiencies affecting cellular and humoral immunity	CID generally less profound than SCID
IKBKB deficiency	IKBKB	AR	Normal number, absent Treg and g/d T cells, impaired TCR activation	Normal number, poor function				[174,175]	Immunodeficiencies affecting cellular and humoral immunity	CID generally less profound than SCID
Ikaros deficiency	IKZF1	AD DN	No memory T cells	No memory B cells	Low			[176-178]	Immunodeficiencies affecting cellular and humoral immunity	CID generally less profound than SCID
IL-21R deficiency	IL21R	AR	Normal number, low cytokine production, poor antigen proliferation	Normal				[179]	Immunodeficiencies affecting cellular and humoral immunity	CID generally less profound than SCID
MALT1 deficiency	MALT1	AR	Normal number, poor proliferation	Normal				[180]	Immunodeficiencies affecting cellular and humoral immunity	CID generally less profound than SCID
MHC class II deficiency group B	RFXANK	AR	Low CD4 cells	Normal	Normal to low			[181]	Immunodeficiencies affecting cellular and humoral immunity	CID generally less profound than SCID
ZAP70 combined hypomorphic GOF	ZAP70	AR LOF/GOF	Decreased CD8, normal or decreased CD4 cells	Normal or decreased				[182-185]	Immunodeficiencies affecting cellular and humoral immunity	CID generally less profound than SCID
Immunodeficiency with centromeric instability and facial anomalies, ICF1	DNMT3B	AR	Decreased or normal, responses to PHA may be decreased	Decreased or normal	Variably low IgG, IgA			[186]	Combined immunodeficiencies with associated or syndromic features	DNA repair defects other than those in Category I
Immunodeficiency with centromeric instability and facial anomalies, ICF2	ZBTB24	AR	Decreased or normal	Decreased or normal	Variably low IgG, IgA			[187]	Combined immunodeficiencies with associated or syndromic features	DNA repair defects other than those in Category I
AD-HIES Job syndrome	STAT3	AD LOF	Normal overall, Th-17 and T-follicular helper cells decreased	Normal, reduced switched and non-switched memory B cells, BAFF expression increased	High IgE	Normal		[188, 189]	Combined immunodeficiencies with associated or syndromic features	Hyper IgE syndromes (HIES)
Methylene-tetrahydrofolate dehydrogenase 1 (MTHFD1) deficiency	MTHFD1	AR	Low thymic output, normal in vitro proliferation	Low	Low	Low		[190]	Combined immunodeficiencies with associated or syndromic features	Defects of vitamin B12 and folate metabolism
SLC46A1/PCFT deficiency causing hereditary folate malabsorbtion	SLC46A1	AR	Variable numbers and activation profile	Variable	Low			[191]	Combined immunodeficiencies with associated or syndromic features	Defects of vitamin B12 and folate metabolism
Transcobalamin 2 deficiency	TCN2	AR	Normal	Variable	Low	Variable		[192]	Combined immunodeficiencies with associated or syndromic features	Defects of vitamin B12 and folate metabolism
EDA-ID due to IKBKB GOF mutation	IKBKB	AD GOF	Low	Normal count, poor function	Low			[193]	Combined immunodeficiencies with associated or syndromic features	Anhidrotic ectodermodysplasia with immunodeficiency (EDA-ID)
EDA-ID due to NEMO /IKBKG deficiency (ectodermal dysplasia, immune deficiency)	IKBKG	XL	Normal or decreased, TCR activation impaired	Normal, Low memory and isotype switched B cells	Decreased, some with elevated IgA, IgM, poor specific antibody responses, absent antibody to polysaccharide antigens		Poor NK function	[175]	Combined immunodeficiencies with associated or syndromic features	Anhidrotic ectodermodysplasia with immunodeficiency (EDA-ID)
ORAI-1 deficiency	ORAI1	AR	Normal, defective TCR mediated activation	Normal	Normal			[194]	Combined immunodeficiencies with associated or syndromic features	Calcium channel defects
AIOLOS deficiency	IKZF3	AD	Normal numbers T, NK cells. Increased naïve CD4+ T cells, RTE. Decreased memory, Tfh; CD40L induction.	Abnormal B cell development	Severe hypogamma			[178, 195]
Widemann-Steiner syndrome	KMT2A	AD	Normal	Variably decreased switched memory B cells	Low			[196]	Combined immunodeficiencies with associated or syndromic features	Other combined immunodeficiencies with syndromic features
Tricho-hepato-enteric syndrome due to SKIV2L mutations	SKIV2L	AR	Impaired function	Variably low switched memory B cells	Low			[197]	Combined immunodeficiencies with associated or syndromic features	Other combined immunodeficiencies with syndromic features
Hepatic veno-occlusive disease with immunodeficiency (VODI)	SP110	AR	Normal (decreased memory T cells)	Normal (decreased memory B cells)	Low			[198, 199]	Combined immunodeficiencies with associated or syndromic features	Other combined immunodeficiencies with syndromic features
BTK deficiency, X-linked agammaglobulinemia (XLA)	BTK	XL	Normal	Very low	Very low	Variable		[200]	Predominantly antibody deficiencies	Agammaglobulinemia
NFKB1 deficiency	NFKB1	AD						[201]	Predominantly antibody deficiencies	Common variable immune deficiency (CVID)
CTLA4 deficiency (ALPSV)	CTLA4	AD	Decreased	Decreased	Variable	Normal		[202]	Diseases of Immune Dysregulation	Regulatory T cell defects
Cystic fibrosis	CFTR	AR				Normal	Macrophage dysfunction	[203]	Congenital defects of phagocyte number or function	Defects of motility
X-linked chronic granulomatous disease (CGD), gp91phox	CYBB	XL			Normal	Normal	Neutrophil dysfunction	[204]	Congenital defects of phagocyte number or function	Defects of respiratory burst
G6PD deficiency Class I	G6PD	XL			Normal	Normal	Neutrophil dysfunction	[205,206]	Congenital defects of phagocyte number or function	Defects of respiratory burst
GATA2 deficiency (MonoMac syndrome)	GATA2	AD		Declining	Normal	Normal	Low monocytes, DC, NK	[207]	Congenital defects of phagocyte number or function	Other non-lymphoid defects
NOS2 deficiency	NOS2	AR	Low CD4 T cells	Low		Normal		[208]	Defects in intrinsic and innate immunity	Predisposition to severe viral infection
IL-17RA deficiency	IL17RA	AR	Normal	Normal	Normal	Normal	Epithelial cells, fibroblasts, mononuclear phagocytes	[209]	Defects in intrinsic and innate immunity	Predisposition to mucocutaneous candidiasis
STAT1 GOF	STAT1	AD GOF	Variable	Variable	Variable	Normal	T cells, B cells, monocytes	[210]	Defects in intrinsic and innate immunity	Predisposition to mucocutaneous candidiasis
IRF4 haplo-insufficiency	IRF4	AD						[211]	Defects in intrinsic and innate immunity	Other inborn errors of immunity related to leukocytes
Aicardi-Goutieres syndrome 7 (AGS7)	IFIH1	AD GOF	Normal	Normal	Normal	Normal		[212]	Autoinflammatory Disorders	Autoinflammatory disorders
DITRA (Deficiency of IL-36 receptor antagonist)	IL36RN	AR	Normal	Normal	Normal	Normal	Keratinocytes, leukocytes	[213]	Autoinflammatory Disorders	Autoinflammatory disorders
TNF receptor-associated periodic syndrome (TRAPS)	TNFRSF1A	AD	Normal	Normal	Normal	Normal	PMNs, monocytes	[214]	Autoinflammatory Disorders	Autoinflammatory disorders
C7 deficiency	C7	AR	Normal	Normal	Normal	Normal		[215]	Complement Deficiencies	Complement deficiencies
DKCB5	RTEL1	AR	normal to low	low			Hematopoietic stem cell	[216]	Bone marrow failure	Bone marrow failure
DKCA1	TERC	AD	normal to low	Normal to low			Hematopoietic stem cell	[217]	Bone marrow failure	Bone marrow failure
BMFS5	TP53	AD	NA	Low			Hematopoietic stem cell	[86,218,219]	Bone marrow failure	Bone marrow failure
All information is directly taken from Table S1 of Tangye et al. 2022 (reference 220) except for deletion of some columns and addition of the references for PCP.
Different categories of immunodeficiencies are color-coded.
Abbreviations: SCID, severe combined immunodeficiency; CID, combined immunodeficiency; EBV, Epstein-Barr virus; MHC, major histocompatibility complex; HPV, human papillomavirus; Treg, T regulatory cell; XL, X-linked inheritance; AR, autosomal recessive inheritance; AD, autosomal dominant inheritance; DN, double-negative; LOF, loss-of-function; GOF, gain-of-function; FTT, failure to thrive.
